# Supplementary material for: Effluent variability in the iron hydroxide adsorption/coprecipitation process
Source: Royal Society of Chemistry journal article supplement (doi:10.1039/d0ra07402k), 1991-04-01
Supplement: d0ra07402k1.pdf [file d0ra07402k1.pdf]

## ***Supplementary Information***

### **List of supplementary information:**

**Text S1** Determination of iron ion concentration

**Text S2** LC-MS Analysis

**Text S3** Energy efficiency

**Fig. S1** Degradation experimental device diagram.

**Fig. S2** Determination of Fe ion concentration in sample reaction process.

**Fig. S3** Comparison of the performance with different methods.

**Fig. S4** Effect of different reaction conditions on performance of Fe-MOFs. (a) MO concentration; (b) discharge voltage; (c) catalyst addition amount; (d) H<sub>2</sub>O<sub>2</sub> addition amount; (e) pH.

**Fig. S5** Recyclability and reusability tests.

**Fig. S6** Effect of capture agents on MO degradation during plasma/Fenton-like process.

**Fig. S7** LC-MS chromatograms corresponding to the intermediates of MO degradation.

**Table S1** Average particle size of Fe-MOFs with different TA/Fe molar ratios

**Table S2** Composition of Fe-MOFs with different TA/Fe molar ratios

**Table S3** Surface and pore structure of Fe-MOFs with different TA/Fe molar ratios

**Table S4** Binding energies of Fe2p, O1s, and C1s for Fe-MOFs

**Table S5** Proportion of different valence elements of Fe-MOFs with different TA/Fe molar ratios

**Table S6** Comparison of degradation ability by different systems

**Table S7** Degradation intermediate

### **Text S1** Determination of iron ion concentration

The iron ion concentration in the solution was determined by o-phenanthroline chromogenic method. Ferrous ion could form a red complex with colorless phenanthroline. The complex had a strong characteristic absorption peak at 510 nm, which could be detected by UV spectrophotometer. When determining the concentration of Fe<sup>2+</sup> or total iron ion, 0.5 mL hydrochloric acid amine solution (100 mg/L) or water was added to 0.5 mL sample to be tested, then 0.5 mL phenanthroline solution (1 g/L) and 0.5 mL sodium acetate solution (mass fraction 10%) were added. Then the solution was shaken evenly for color development and the absorbance of the sample was determined.

### **Text S2** LC-MS Analysis

The intermediates were isolated using an ACQUITY UPLC® BEH C18 column (2.1 × 50 mm, 1.7 μm). A mobile phase including formic acid (A) and acetonitrile (B) was used. Sample Cone: 30-60 V; Extraction Cone: 30-60 V; Source temperature: 120 °C; Desolvation temperature: 350 °C; Cone Gas: 50 L/h; Desolvation Gas: 800 L/h. According to the mass-to-charge (*m/z*) value, the LC-MS chromatogram of the intermediate product of MO degradation was shown in Fig. S7.

### **Text S3** Energy efficiency

In order to quantitatively evaluate the energy efficiency under different systems, the conversion rate per unit time per unit current was calculated according to Equation (S1-1), which was expressed as *EE* (A<sup>-1</sup>min<sup>-1</sup>):

$$EE = \frac{d_r}{I \times t} \quad (\text{S1-1})$$

Where  $I$  (A) was the current,  $t$  (min) was the degradation time,  $d_r$  (%) was final degradation rate, and  $EE$  ( $A^{-1}min^{-1}$ ) was energy efficiency.

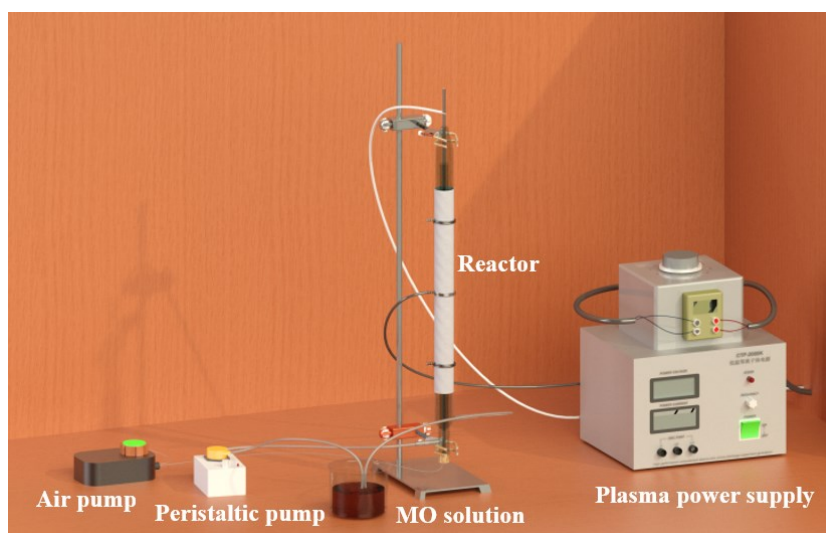

**Fig. S1** Degradation experimental device diagram.

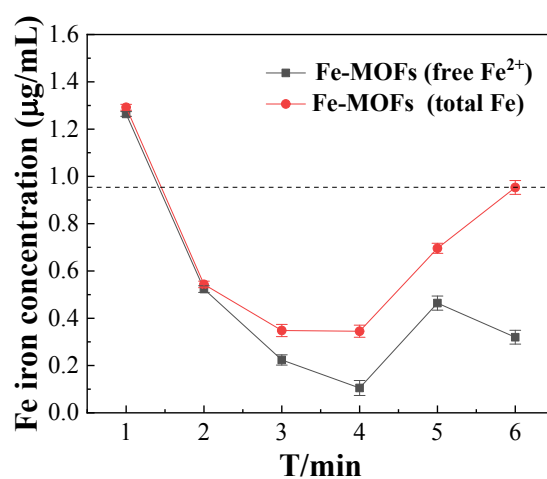

**Fig. S2** Determination of Fe ion concentration in sample reaction process.

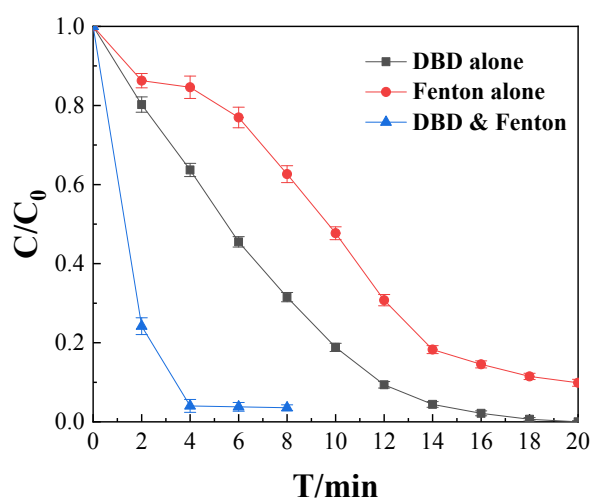

**Fig. S3** Comparison of the performance with different methods.

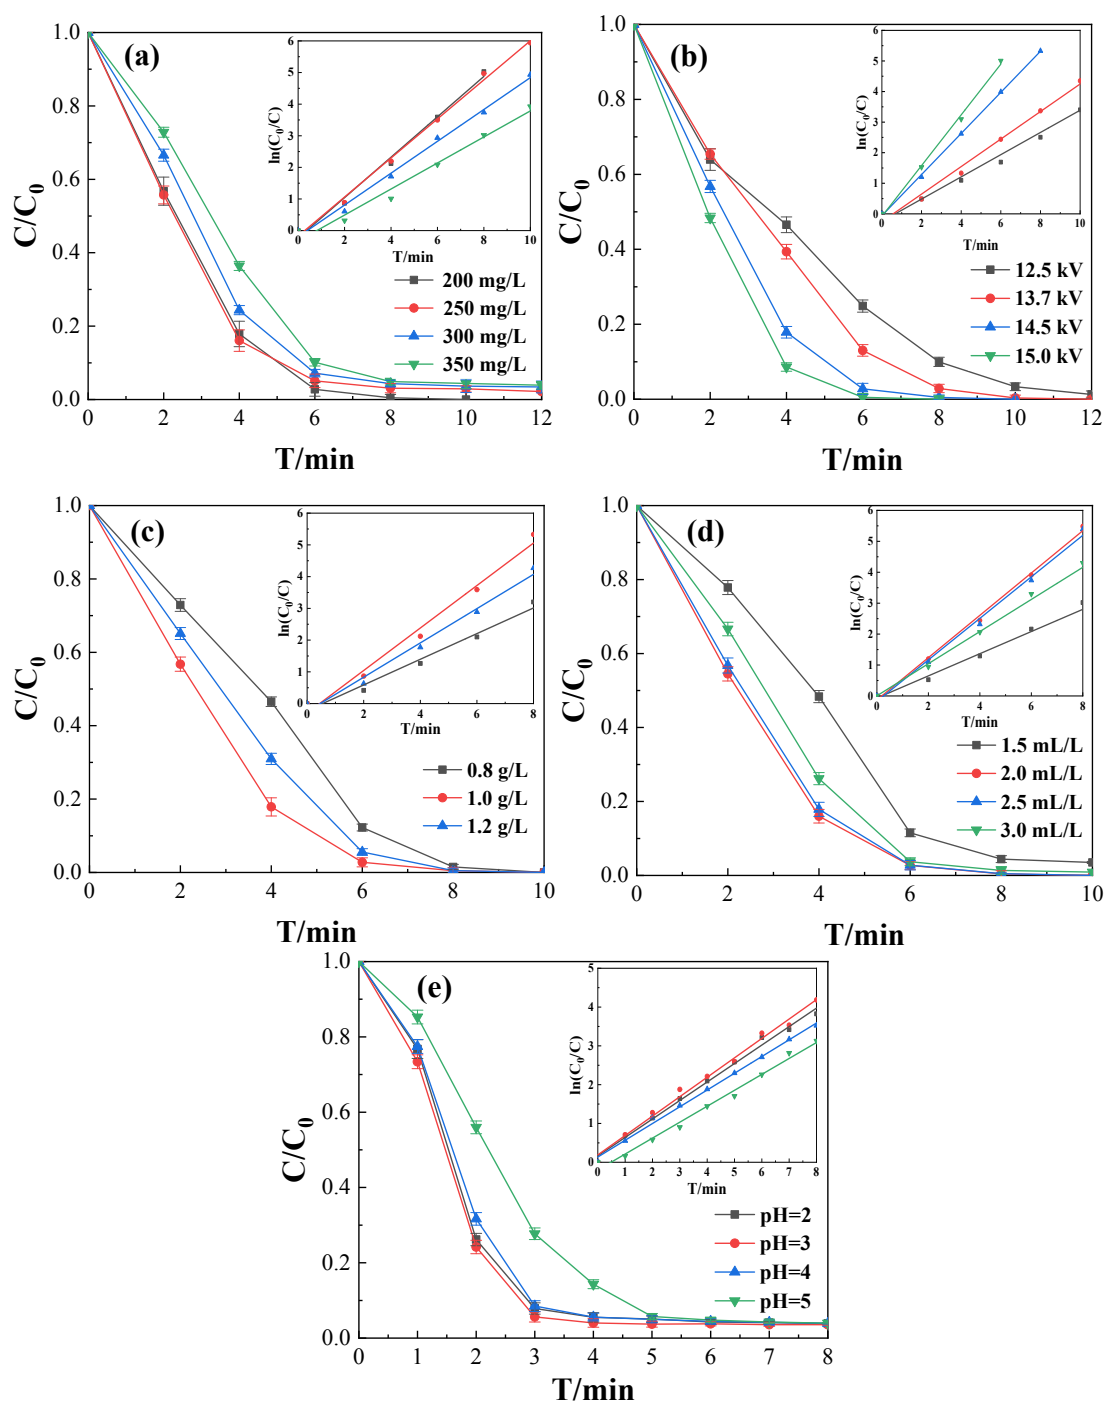

**Fig. S4** Effect of different reaction conditions on performance of Fe-MOFs (a) MO concentration;

(b) discharge voltage; (c) catalyst addition amount; (d)  $\text{H}_2\text{O}_2$  addition amount; (e) pH.

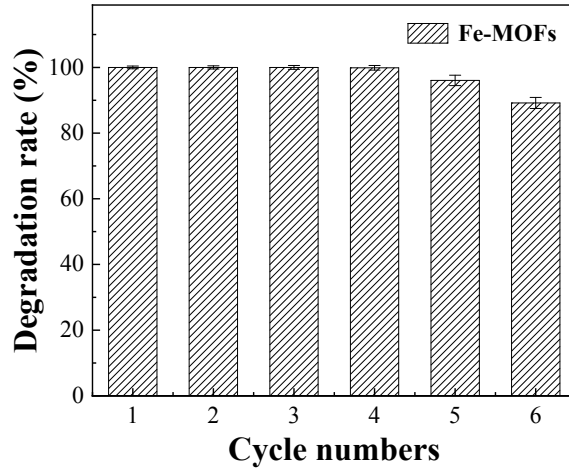

Fig. S5 Recyclability and reusability tests.

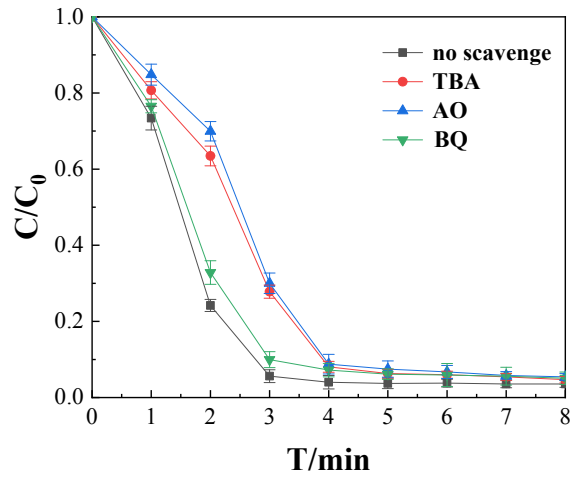

Fig. S6 Effect of capture agents on MO degradation during plasma/Fenton-like process.

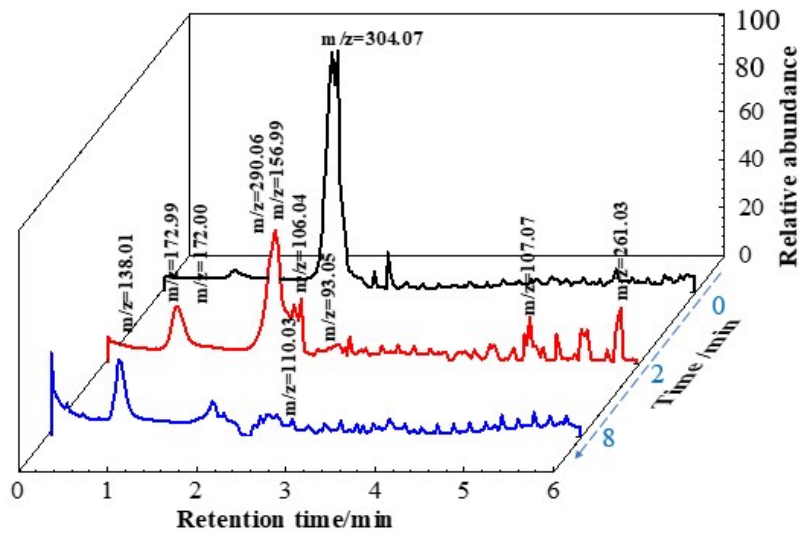

Fig. S7 LC-MS chromatograms corresponding to the intermediates of MO degradation.

**Table S1** Average particle size of Fe-MOFs with different TA/Fe molar ratios

| TA/Fe<br>molar ratio | Average particle<br>size<br>/(nm) |
|----------------------|-----------------------------------|
| 1: 1                 | 49                                |
| 1: 2                 | 24                                |
| 1: 3                 | 17                                |
| 1: 4                 | 23                                |

**Table S2** Composition of Fe-MOFs with different TA/Fe molar ratios

| TA/Fe<br>molar ratio | EDS wt% |       |
|----------------------|---------|-------|
|                      | Fe      | O     |
| 1: 1                 | 24.19   | 75.81 |
| 1: 2                 | 32.61   | 67.39 |
| 1: 3                 | 43.39   | 56.61 |
| 1: 4                 | 28.31   | 71.69 |

**Table S3** Surface and pore structure of Fe-MOFs with different TA/Fe molar ratios

| TA/Fe<br>molar ratio | Surface area<br>( $\text{m}^2 \cdot \text{g}^{-1}$ ) | Average pore size<br>(nm) | Pore volume<br>( $\text{cm}^3 \cdot \text{g}^{-1}$ ) |
|----------------------|------------------------------------------------------|---------------------------|------------------------------------------------------|
| 1: 1                 | 3.123                                                | 3.816                     | 0.007                                                |
| 1: 2                 | 20.864                                               | 3.411                     | 0.154                                                |
| 1: 3                 | 32.021                                               | 17.186                    | 0.210                                                |
| 1: 4                 | 19.992                                               | 3.410                     | 0.131                                                |

**Table S4** Binding energies of Fe2p, O1s, and C1s for Fe-MOFs

| TA/Fe<br>molar<br>ratio | Binding energy /(eV)                  |                                       |                   |                                       |                                       |        |        |        |        |        |
|-------------------------|---------------------------------------|---------------------------------------|-------------------|---------------------------------------|---------------------------------------|--------|--------|--------|--------|--------|
|                         | Fe 2p                                 |                                       |                   | C1s                                   |                                       |        | O1s    |        |        |        |
|                         | Fe <sup>2+</sup><br>2p <sub>3/2</sub> | Fe <sup>3+</sup><br>2p <sub>3/2</sub> | satellite<br>peak | Fe <sup>2+</sup><br>2p <sub>1/2</sub> | Fe <sup>3+</sup><br>2p <sub>1/2</sub> | C1s A  | C1s    | C1s B  | O1s    | O1s A  |
| 1: 1                    | 711.17                                | 712.94                                | 717.02            | 724.48                                | 726.46                                | 284.54 | 285.34 | 288.91 | 531.44 | 532.18 |
| 1: 2                    | 711.40                                | 713.36                                | 717.51            | 724.81                                | 726.74                                | 284.72 | 285.73 | 288.67 | 531.25 | 531.97 |
| 1: 3                    | 711.11                                | 712.72                                | 716.18            | 724.47                                | 726.10                                | 284.68 | 285.61 | 288.64 | 531.24 | 532.00 |
| 1: 4                    | 711.08                                | 712.49                                | 715.59            | 724.01                                | 726.00                                | 284.70 | 285.80 | 288.64 | 531.31 | 532.09 |



**Table S5** Proportion of different valence elements of Fe-MOFs with different TA/Fe molar ratios

| TA/Fe<br>molar ratio | Proportion /(%)  |                  |                                    |                                                          |
|----------------------|------------------|------------------|------------------------------------|----------------------------------------------------------|
|                      | Fe <sup>2+</sup> | Fe <sup>3+</sup> | Fe <sup>2+</sup> /Fe <sup>3+</sup> | [O] <sub>s</sub> /([O] <sub>l</sub> + [O] <sub>s</sub> ) |
| 1: 1                 | 46.85            | 45.36            | 1.03                               | 42.89                                                    |
| 1: 2                 | 43.21            | 38.22            | 1.13                               | 43.96                                                    |
| 1: 3                 | 46.83            | 39.94            | 1.17                               | 44.00                                                    |
| 1: 4                 | 42.27            | 46.85            | 0.90                               | 42.61                                                    |

**Table S6** Comparison of degradation ability by different systems

| systems                       | catalyst                             | pollutants           | pH  | pollutants concentration (mg/L) | pollutants treatment capacity (mL) | catalyst addition amount (g/L) | Reaction time (min) | Degradation rate (d <sub>r</sub> ) (%) | EE (A <sup>-1</sup> min <sup>-1</sup> ) | References |
|-------------------------------|--------------------------------------|----------------------|-----|---------------------------------|------------------------------------|--------------------------------|---------------------|----------------------------------------|-----------------------------------------|------------|
| <b>DBD plasma/Fenton-like</b> | Fe-MOFs                              | MO                   | 3   | 200                             | 200                                | 1.0                            | 8                   | 96.4                                   | 8.03                                    | This work  |
| <b>PDP/Fenton</b>             | FeSO <sub>4</sub> ·7H <sub>2</sub> O | Bisphenol A          | 5.5 | 4.566                           | 600                                | 2.0                            | 30                  | 97                                     | 2.16                                    | [11]       |
| <b>GAD/Fenton</b>             | ZVI (Fe <sup>0</sup> )               | Acid Orange 7        | 7.4 | 63                              | 400                                | 26                             | 25                  | 80                                     | 0.64                                    | [13]       |
| <b>Electro Fenton</b>         | pyrite                               | tyrosol              | 3   | 41                              | 250                                | 1.0                            | 60                  | 96                                     | 5.33                                    | [38]       |
| <b>Electro Fenton</b>         | FeSO <sub>4</sub> ·7H <sub>2</sub> O | chloroquine drug     | 3   | 125                             | 400                                | 0.01                           | 300                 | 100                                    | 5.56                                    | [39]       |
| <b>Electro Fenton</b>         | iron plate electrode                 | diisobutyl phthalate | 4   | 10                              | 500                                | -                              | 45                  | 93                                     | 2.07                                    | [40]       |

**Table S7** Degradation intermediate

| Relative molecular mass | Structure                                                                            |
|-------------------------|--------------------------------------------------------------------------------------|
| 304.07                  | 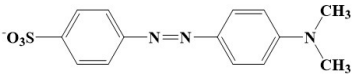   |
| 290.06                  |    |
| 261.03                  |    |
| 172.99                  |    |
| 172.00                  |    |
| 156.99                  |    |
| 138.01                  |    |
| 110.03                  |   |
| 107.07                  |  |
| 106.04                  |  |
| 93.05                   |  |

## References

11. F. Dai, X.R. Fan, G.R. Stratton, C.L. Bellona, T.M. Holsen, B.S. Crimmins, X.Y. Xia, S.M. Thagard, *J. Hazard. Mater.* 2016, 308, 419-429.  
<https://doi.org/10.1016/j.jhazmat.2016.01.068>.
13. C.M. Du, L.L. Zhang, J. Wang, C.R. Zhang, H.X. Li, Y. Xiong, *Plasma Chem. Plasma P.* 2010, 30, 855-871. <https://doi.org/10.1007/s11090-010-9249-0>.
38. S. Ammar, M.A. Oturan, L. Labiadh, A. Guersalli, R. Abdelhedi, N. Oturan, E. Brillas, *Water Res.*, 2015, 74, 77-87. <http://dx.doi.org/10.1016/j.watres.2015.02.006>.
39. S. Midassi, A. Bedoui, N. Bensalah, *Chemosphere.*, 2020, 260, 127558.  
<https://doi.org/10.1016/j.chemosphere.2020.127558>.
40. Z.Q. Yang, H.L. Chen, J.H. Wang, Q.F. Yuan, F. Wang, B.H. Zhou, *J. Environ. Chem. Eng.*, 2020, 8, 104057. <https://doi.org/10.1016/j.jece.2020.104057>.
